# Supplementary material
Source: publisher site journal article supplement (https://www.dovepress.com/article/422898)
Supplement: Supplementary file 1 [file get_supplementary_file.php]

# Supplementary Data

## Study record 42560

Generated: 10/10/2022 8:39:38

Editorial Status: Queries with trialist

### Title and Additional Identifiers

**Submission number**

42560

**ISRCTN****DOI****Public title**

Efficacy and safety of sun block in the management of acne and post acne pigmentation among Malaysian patients

**Scientific title**

A comprehensive study of the efficacy and safety of Licochalcone A , Glycyrrhetic acid and L-Carnitine containing sun block in the management of acne and post acne pigmentation among Malaysian patients : A randomized, double blinded, comparator controlled trial

**Acronym****EudraCT number**

Nil known

**IRAS number****ClinicalTrials.gov number**

Nil known

**Protocol /serial number**

JKEUPM-2021-288 (NMRR-21-793-59045)

**Condition category**

Skin and Connective Tissue Diseases

**Date Applied**

07/10/2022

**Last Edited**

~~Date Assigned~~

**Prospective/Retrospective**

**Overall Trial Status**

Completed

**Recruitment status**

No longer recruiting

**Study Information****Study hypothesis**

Licochalcone A, Glycyrrhetic acid and L-Carnitine containing sunscreen is effective in reducing acne and post acne hyperpigmentation.

**Ethics approval**

Approved 06/10/2021, Universiti Putra Malaysia Ethic Committee for Research Involving Human Subject (JKEUPM; +60 397691605; jkeupm@upm.edu.my), ref: UPM/TNCPI/RMC/JKEUPM/1.4.18.2

**Study design**

Randomized controlled trial

**Primary study design**

Interventional

**Secondary study design**

Randomised controlled trial

**Trial setting**

Hospitals

**Trial type**

Treatment

**Overall trial start date**

06/10/2021

**Overall trial end date**

30/07/2022

**Overall trial status override****Reason abandoned (if study stopped)****Condition**

Improve the treatment of acne and acne pigmentation

**Interventions**

Licochalcone A , Glycyrrhetic acid and L-Carnitine containing sun block

**Intervention Type**

Other

## Phase

### Drug name(s)

#### Primary outcome measure

1. Acne severity using CASS at baseline and week 6
2. Post acne pigmentation using PAHPI at baseline and week 6

#### Secondary outcome measures

At baseline and week 6:

1. Total number of inflammatory and non inflammatory acne
2. Acne severity using GAGS
3. Post acne pigmentation using skin analyser
4. Sebum using ...
5. Skin pH using ...
6. Treatment related complications using ...
7. Weight of cleanser, tretinoin and sunblock – determine compliance using ...
8. Patient satisfaction to treatment using ...
9. Acne related quality of life using CADI

### Trial website

#### Participant information sheet

Not available in web format, please use the contact details to request a patient information sheet.

## Eligibility

#### Participant inclusion criteria

1. Males and females with acne vulgaris aged  $\geq 18$  years old
2. Clinically diagnosed by dermatologist as acne vulgaris on the face with
  - 2.1. Inflammatory lesion (papules and pustules) of  $< 25$
  - 2.2. Non inflammatory lesions (open or close comedones of  $< 50$ )
3. Patient must have post acne pigmentation with at least a PAHPI score of 6

#### Participant type

Patient

#### Age group

Adult

#### Gender

Both

#### Target number of participants

56

#### Total final Enrolment

50

## **Participant exclusion criteria**

1. Other forms of acne (acne conglobata, acne excoriata, acne rosacea, acne cosmetica, pomade acne, acne fulminans, acne keloidalis nuchae, acne chloracne, acne mechanica and acne medicamentosa)
2. Nodulocystic acne
3. CASS 4-5
4. On oral antibiotic for the last 1 months
5. On oral isotretinoin for the last 6 months
6. On topical antimicrobial or tretinoin for the last 2 weeks
7. Photosensitivity
8. If patient is currently pregnant or lactating
9. Other comorbidities that require any route of medication commencement (i.e hypertension, diabetes, dyslipidemia, bronchial asthma)
10. If there is any known allergy to the active ingredients in the preparation
11. Patients who have any other facial dermatoses
12. Patients who like outdoor activities and couldn't comply to sunprotection.

## **Recruitment start date**

01/03/2022

## **Recruitment end date**

30/06/2022

## **Recruitment status override**

# **Locations**

## **Countries of recruitment**

Malaysia

## **Trial participating centres**

## **Trial Centre**

### **Trial Centre Name**

Universiti Putra Malaysia Teaching Hospital

### **Address**

Persiaran Mardi - Upm

### **City**

Serdang

### **Country**

Malaysia

### **Zip**

43400

# Plain English Summary

## Background and study aims:

Acne affects up to 85% of the adolescents, with 80% of cases may develop post acne pigmentation. Retinoids are effective, but intolerance is common, thus limiting their usage. Cosmeceuticals may improve tolerability of retinoids. We aim to explore the effectiveness and tolerability of a Lichochalcone A containing sunscreen in the management of acne and post acne pigmentation.

## Who can participate:

Adults, male and female, with mild to moderate acne vulgaris, complicating with post acne pigmentation are eligible to participate

## What does this study involve?

This is a randomized, double blinded, comparator-controlled trial will be conducting in the Universiti Putra Malaysia Teaching Hospital from March 2022 to June 2022. A 2-week walk-in period will be used to assess the efficacy and tolerability of adapalene. The subjects will then randomized into two arms, each receiving different sunscreen, to be used concurrently with adapalene. They will be followed up for another 4 weeks to observe for the improvement of acne severity, post acne hyperpigmentation index, melanin and erythema index and complication rates.

## What are the possible benefits and risks of participating?

### (a) TO THE SUBJECT

You will be closely followed up according to the study protocol and get to be monitored closely for any potential intolerance to the treatment received. You will also be receiving a good quality sunscreen, which may or may not benefit your facial acne and pigmentation. You will get to have your skin assessed in a more objective manner, which rarely available during the usual clinic consult. During each followup, you will be assigned with a RM30 emolument to cover your travel expenses. Please be informed that tea/ lunch will be provided, depending on your visiting time.

### (b) TO THE INVESTIGATOR

This study will allow the health care provider to understand the role of sunprotection and its active ingredients in acne and acne pigmentation management better.

## Where is the study run from?

Universiti Putra Malaysia Teaching Hospital

## When is the study starting and how long is it expected to run for?

October 2021 to July 2022

## Who is funding the study?

This study will be funded by Beiersdorf (Malaysia) Sdn Bhd

## Who is the main contact?

Dr Kang Nien How, hkangnien@upm.edu.my

# Results and Publications

## Publication and dissemination plan

Planned publication in a Q3 ISI indexed journal "Cosmetic"

**IPD Sharing statement**

The data-sharing plans for the current study are unknown and will be made available at a later date

**Intention to publish date**

30/10/2022

**Participant level data**

Data sharing statement to be made available at a later date

**Basic results (scientific)****Results (plain English)****Publication list****Publication citation(s)****Contact(s)****Contact****Type**

Principal Investigator

**Title**

Dr

**Name**

Kang Nien How

**ORCID ID**

<http://orcid.org/0000-0002-8032-9804>

**Address**

Faculty of Medicine and Health Sciences  
Universiti Putra Malaysia

**City**

Serdang

**Country**

Malaysia

**Zip**

43400

**Tel**

03 9769 5601

**Email**

hkangnien@upm.edu.my

**Privacy**

Public

## Sponsor(s)

### Sponsor

**Organisation**

Beiersdorf (Malaysia)

**Address**

Level 12, Tower 1  
PJ33, 3, Jalan Professor Khoo Kay Kim  
Seksyen 13

**City**

Petaling Jaya

**Country**

Malaysia

**Zip**

46200

**Tel**

+60 3-7940 9668

**Email**

Wilson.Chew@Beiersdorf.com

**Type**

Industry

**Website**

**Privacy**

Public

## Funder(s)

**Funding Type**

Industry

## **Funder**

### **Funder Name**

Beiersdorf

### **Alternative Name(s)**

### **Funding Body Type**

Private sector organisation

### **Funding Body Subtype**

For-profit companies (industry)

### **Location**

Germany

## **Applicant Details**

### **Name**

Kang Nien How

### **ORCID ID**

### **Address**

### **City**

### **Country**

### **Zip**

### **Tel**

### **Email**

hkangnien@upm.edu.my

## **Payment Method**

### **Payment method**

Online payment

### **Trusted funder**

## **Invoice Details**

### **Name**

### **Institution**



**Address**

**City**

**State**

**Country**

**Zip**

**Email**

**Purchase order/ reference number**

**VAT number**

**Why did you choose ISRCTN to register your trial?**

Previously registered a trial
